# Supplementary material
Source: publisher figshare collection journal article supplement (https://aacr.figshare.com/articles/dataset/_/22431627)

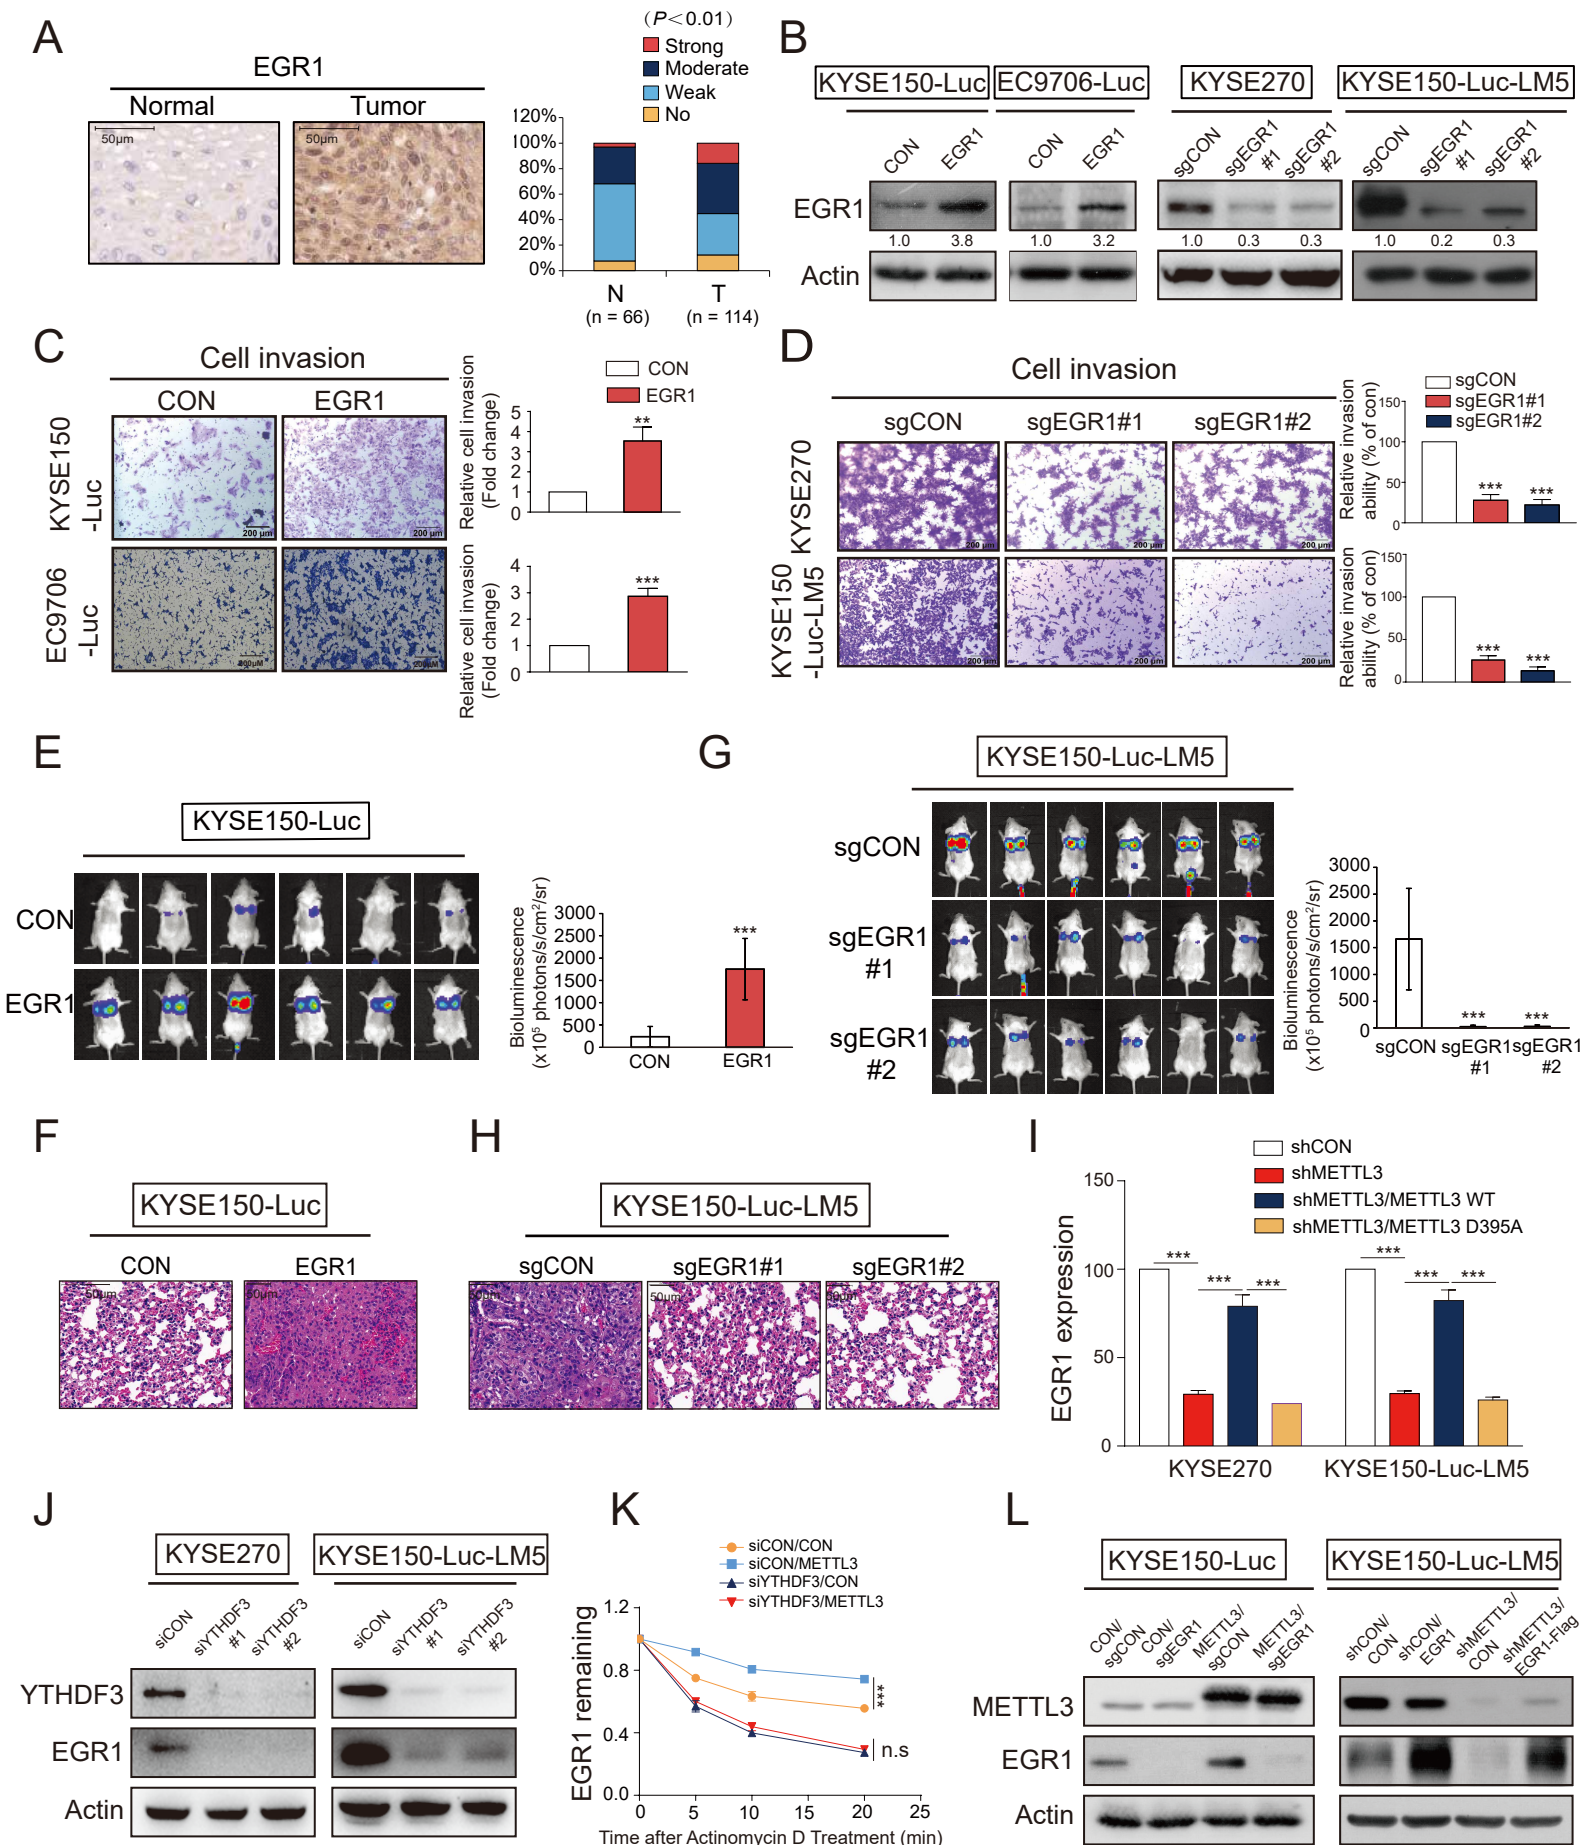

Supplementary Figure 4

Supplement: Supplementary file 1 [file 39877989]
